# Supplementary material
Source: PubMed Central journal article supplement (PMC3361702)

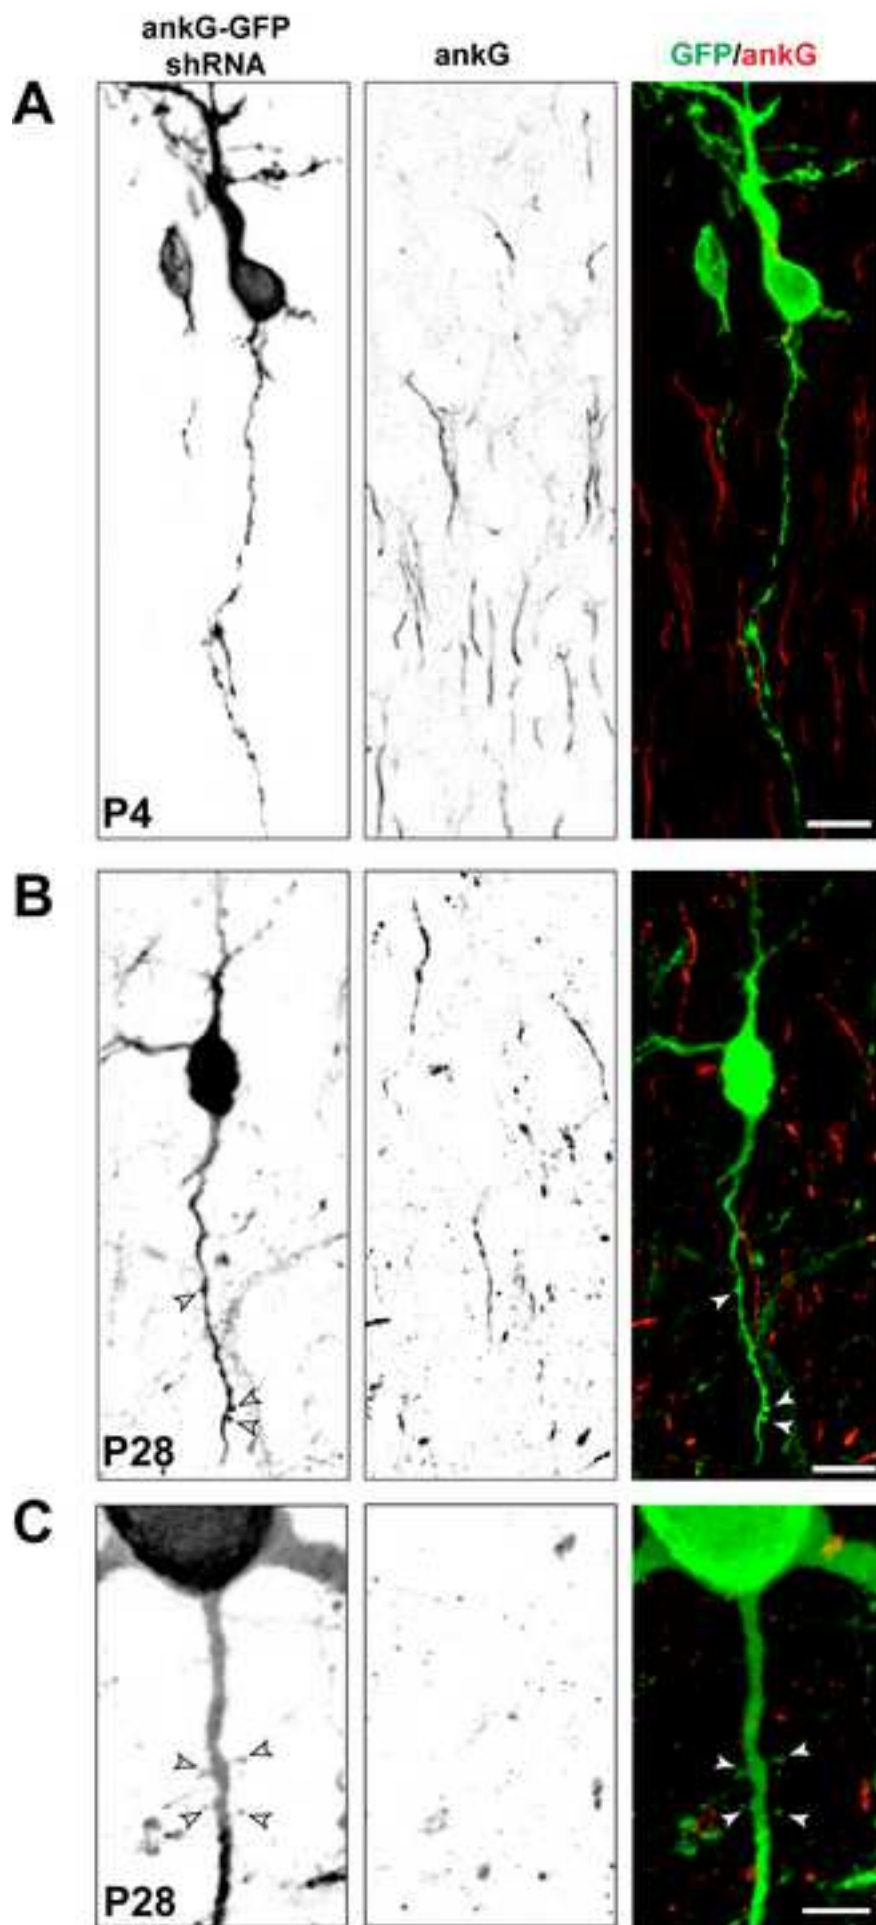

Control

AnkGshRNA

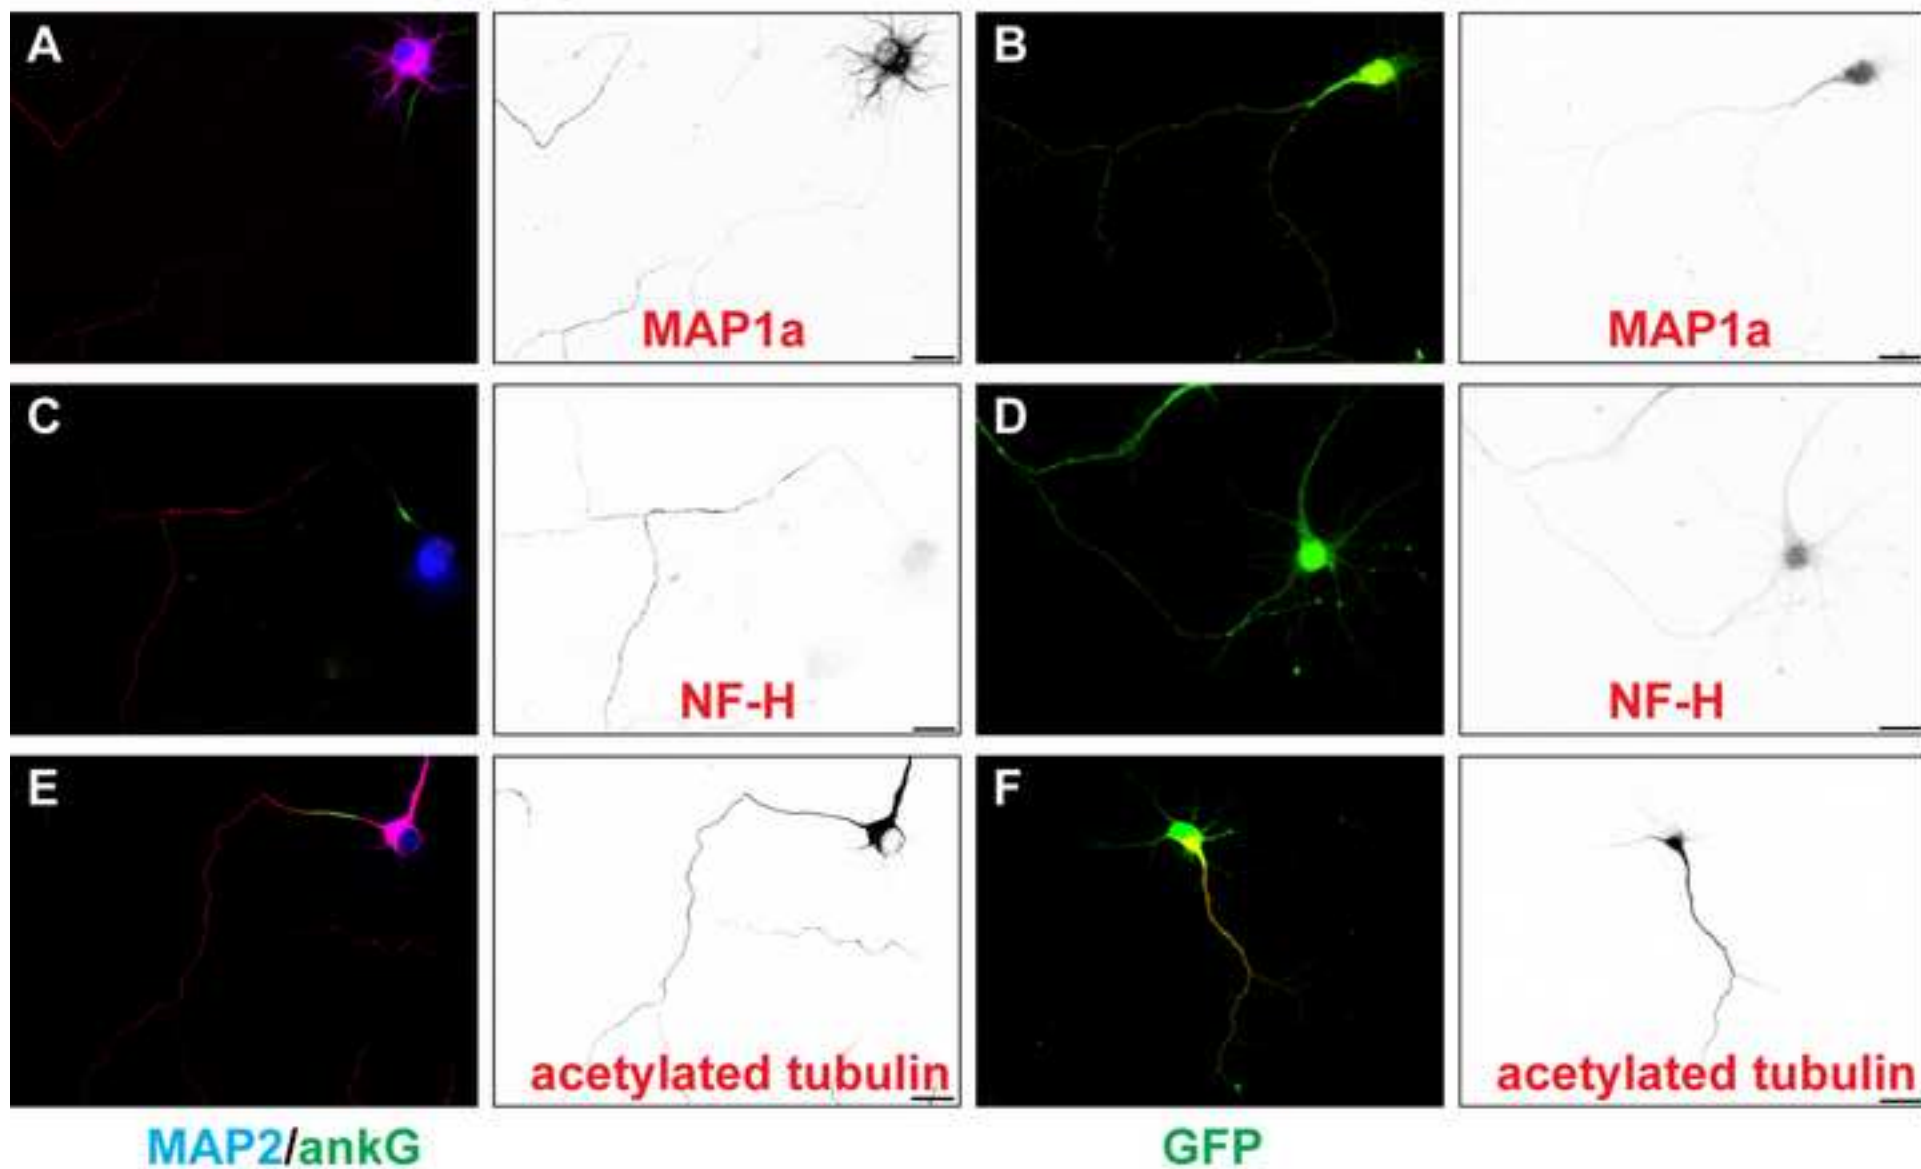

Supplement: NIHMS371898-supplement-02.pdf [file NIHMS371898-supplement-02.pdf]
